# Supplementary material for: Efficiency and robustness in Monte Carlo sampling for 3-D geophysical inversions with Obsidian v0.1.2: setting up for success
Source: Copernicus journal article supplement (doi:10.5194/gmd-12-2941-2019), 2019-07-15
Supplement: Supplementary file 1 [file gmd-12-2941-2019-supplement.zip]

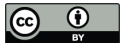

## *Supplement of*

# **Efficiency and robustness in Monte Carlo sampling for 3-D geophysical inversions with Obsidian v0.1.2: setting up for success**

**Richard Scalzo et al.**

*Correspondence to:* Richard Scalzo (richard.scalzo@sydney.edu.au)

- gmd-12-2941-2019-supplement-title-page.pdf
- scalzo18-configs
  - moomba\_runA
    - \* BigLakeSuiteCtrlMask.csv
    - \* BigLakeSuiteCtrlMax.csv
    - \* BigLakeSuiteCtrlMin.csv
    - \* BigLakeSuiteOffset.csv
    - \* BigLakeSuiteRockCov.csv
    - \* BigLakeSuiteRockMask.csv
    - \* BigLakeSuiteRockMaxs.csv
    - \* BigLakeSuiteRockMeans.csv
    - \* BigLakeSuiteRockMins.csv
    - \* EyreCtrlMask.csv
    - \* EyreCtrlMax.csv
    - \* EyreCtrlMin.csv
    - \* EyreOffset.csv
    - \* EyreRockCov.csv
    - \* EyreRockMask.csv
    - \* EyreRockMaxs.csv
    - \* EyreRockMeans.csv
    - \* EyreRockMins.csv
    - \* InnaminckaCtrlMask.csv
    - \* InnaminckaCtrlMax.csv
    - \* InnaminckaCtrlMin.csv
    - \* InnaminckaOffset.csv
    - \* InnaminckaRockCov.csv
    - \* InnaminckaRockMask.csv

- \* InnaminckaRockMaxs.csv
- \* InnaminckaRockMeans.csv
- \* InnaminckaRockMins.csv
- \* MurtaCtrlMask.csv
- \* MurtaCtrlMax.csv
- \* MurtaCtrlMin.csv
- \* MurtaOffset.csv
- \* MurtaRockCov.csv
- \* MurtaRockMask.csv
- \* MurtaRockMaxs.csv
- \* MurtaRockMeans.csv
- \* MurtaRockMins.csv
- \* NamurCtrlMask.csv
- \* NamurCtrlMax.csv
- \* NamurCtrlMin.csv
- \* NamurOffset.csv
- \* NamurRockCov.csv
- \* NamurRockMask.csv
- \* NamurRockMaxs.csv
- \* NamurRockMeans.csv
- \* NamurRockMins.csv
- \* SimulationCtrlPoints.csv
- \* SimulationRockProperties.csv
- \* ToolacheeCtrlMask.csv
- \* ToolacheeCtrlMax.csv
- \* ToolacheeCtrlMin.csv
- \* ToolacheeOffset.csv
- \* ToolacheeRockCov.csv
- \* ToolacheeRockMask.csv
- \* ToolacheeRockMaxs.csv
- \* ToolacheeRockMeans.csv
- \* ToolacheeRockMins.csv
- \* contactpointReadings.csv
- \* contactpointSensors.csv
- \* gravReadings.csv
- \* gravSensors.csv
- \* magReadings.csv
- \* magSensors.csv
- \* moomba.obsidian
- \* mtReadings.csv
- \* mtSensors.csv
- \* obsidian\_config
- \* seismicReadings.csv
- \* seismicSensors.csv
- \* thermalReadings.csv
- \* thermalSensors.csv

– moomba\_runA1

- \* BigLakeSuiteCtrlMask.csv
- \* BigLakeSuiteCtrlMax.csv
- \* BigLakeSuiteCtrlMin.csv
- \* BigLakeSuiteOffset.csv
- \* BigLakeSuiteRockCov.csv
- \* BigLakeSuiteRockMask.csv
- \* BigLakeSuiteRockMaxs.csv
- \* BigLakeSuiteRockMeans.csv
- \* BigLakeSuiteRockMins.csv
- \* EyreCtrlMask.csv
- \* EyreCtrlMax.csv
- \* EyreCtrlMin.csv
- \* EyreOffset.csv
- \* EyreRockCov.csv
- \* EyreRockMask.csv
- \* EyreRockMaxs.csv
- \* EyreRockMeans.csv
- \* EyreRockMins.csv
- \* InnaminckaCtrlMask.csv
- \* InnaminckaCtrlMax.csv
- \* InnaminckaCtrlMin.csv
- \* InnaminckaOffset.csv
- \* InnaminckaRockCov.csv
- \* InnaminckaRockMask.csv
- \* InnaminckaRockMaxs.csv
- \* InnaminckaRockMeans.csv
- \* InnaminckaRockMins.csv
- \* MurtaCtrlMask.csv
- \* MurtaCtrlMax.csv
- \* MurtaCtrlMin.csv
- \* MurtaOffset.csv
- \* MurtaRockCov.csv
- \* MurtaRockMask.csv
- \* MurtaRockMaxs.csv
- \* MurtaRockMeans.csv
- \* MurtaRockMins.csv
- \* NamurCtrlMask.csv
- \* NamurCtrlMax.csv
- \* NamurCtrlMin.csv
- \* NamurOffset.csv
- \* NamurRockCov.csv
- \* NamurRockMask.csv
- \* NamurRockMaxs.csv
- \* NamurRockMeans.csv
- \* NamurRockMins.csv
- \* SimulationCtrlPoints.csv
- \* SimulationRockProperties.csv

- \* ToolacheeCtrlMask.csv
- \* ToolacheeCtrlMax.csv
- \* ToolacheeCtrlMin.csv
- \* ToolacheeOffset.csv
- \* ToolacheeRockCov.csv
- \* ToolacheeRockMask.csv
- \* ToolacheeRockMaxs.csv
- \* ToolacheeRockMeans.csv
- \* ToolacheeRockMins.csv
- \* contactpointReadings.csv
- \* contactpointSensors.csv
- \* gravReadings.csv
- \* gravSensors.csv
- \* magReadings.csv
- \* magSensors.csv
- \* moomba.obsidian
- \* mtReadings.csv
- \* mtSensors.csv
- \* obsidian\_config
- \* seismicReadings.csv
- \* seismicSensors.csv
- \* thermalReadings.csv
- \* thermalSensors.csv
- moomba\_runB
  - \* BigLakeSuiteCtrlMask.csv
  - \* BigLakeSuiteCtrlMax.csv
  - \* BigLakeSuiteCtrlMin.csv
  - \* BigLakeSuiteOffset.csv
  - \* BigLakeSuiteRockCov.csv
  - \* BigLakeSuiteRockMask.csv
  - \* BigLakeSuiteRockMaxs.csv
  - \* BigLakeSuiteRockMeans.csv
  - \* BigLakeSuiteRockMins.csv
  - \* EyreCtrlMask.csv
  - \* EyreCtrlMax.csv
  - \* EyreCtrlMin.csv
  - \* EyreOffset.csv
  - \* EyreRockCov.csv
  - \* EyreRockMask.csv
  - \* EyreRockMaxs.csv
  - \* EyreRockMeans.csv
  - \* EyreRockMins.csv
  - \* InnaminckaCtrlMask.csv
  - \* InnaminckaCtrlMax.csv
  - \* InnaminckaCtrlMin.csv
  - \* InnaminckaOffset.csv
  - \* InnaminckaRockCov.csv

- \* InnaminckaRockMask.csv
- \* InnaminckaRockMaxs.csv
- \* InnaminckaRockMeans.csv
- \* InnaminckaRockMins.csv
- \* MurtaCtrlMask.csv
- \* MurtaCtrlMax.csv
- \* MurtaCtrlMin.csv
- \* MurtaOffset.csv
- \* MurtaRockCov.csv
- \* MurtaRockMask.csv
- \* MurtaRockMaxs.csv
- \* MurtaRockMeans.csv
- \* MurtaRockMins.csv
- \* NamurCtrlMask.csv
- \* NamurCtrlMax.csv
- \* NamurCtrlMin.csv
- \* NamurOffset.csv
- \* NamurRockCov.csv
- \* NamurRockMask.csv
- \* NamurRockMaxs.csv
- \* NamurRockMeans.csv
- \* NamurRockMins.csv
- \* SimulationCtrlPoints.csv
- \* SimulationRockProperties.csv
- \* ToolacheeCtrlMask.csv
- \* ToolacheeCtrlMax.csv
- \* ToolacheeCtrlMin.csv
- \* ToolacheeOffset.csv
- \* ToolacheeRockCov.csv
- \* ToolacheeRockMask.csv
- \* ToolacheeRockMaxs.csv
- \* ToolacheeRockMeans.csv
- \* ToolacheeRockMins.csv
- \* contactpointReadings.csv
- \* contactpointSensors.csv
- \* gravReadings.csv
- \* gravSensors.csv
- \* magReadings.csv
- \* magSensors.csv
- \* moomba.obsidian
- \* mtReadings.csv
- \* mtSensors.csv
- \* obsidian\_config
- \* seismicReadings.csv
- \* seismicSensors.csv
- \* thermalReadings.csv
- \* thermalSensors.csv

– moomba\_runB1

- \* BigLakeSuiteCtrlMask.csv
- \* BigLakeSuiteCtrlMax.csv
- \* BigLakeSuiteCtrlMin.csv
- \* BigLakeSuiteOffset.csv
- \* BigLakeSuiteRockCov.csv
- \* BigLakeSuiteRockMask.csv
- \* BigLakeSuiteRockMaxs.csv
- \* BigLakeSuiteRockMeans.csv
- \* BigLakeSuiteRockMins.csv
- \* EyreCtrlMask.csv
- \* EyreCtrlMax.csv
- \* EyreCtrlMin.csv
- \* EyreOffset.csv
- \* EyreRockCov.csv
- \* EyreRockMask.csv
- \* EyreRockMaxs.csv
- \* EyreRockMeans.csv
- \* EyreRockMins.csv
- \* InnaminckaCtrlMask.csv
- \* InnaminckaCtrlMax.csv
- \* InnaminckaCtrlMin.csv
- \* InnaminckaOffset.csv
- \* InnaminckaRockCov.csv
- \* InnaminckaRockMask.csv
- \* InnaminckaRockMaxs.csv
- \* InnaminckaRockMeans.csv
- \* InnaminckaRockMins.csv
- \* MurtaCtrlMask.csv
- \* MurtaCtrlMax.csv
- \* MurtaCtrlMin.csv
- \* MurtaOffset.csv
- \* MurtaRockCov.csv
- \* MurtaRockMask.csv
- \* MurtaRockMaxs.csv
- \* MurtaRockMeans.csv
- \* MurtaRockMins.csv
- \* NamurCtrlMask.csv
- \* NamurCtrlMax.csv
- \* NamurCtrlMin.csv
- \* NamurOffset.csv
- \* NamurRockCov.csv
- \* NamurRockMask.csv
- \* NamurRockMaxs.csv
- \* NamurRockMeans.csv
- \* NamurRockMins.csv
- \* SimulationCtrlPoints.csv

- \* SimulationRockProperties.csv
- \* ToolacheeCtrlMask.csv
- \* ToolacheeCtrlMax.csv
- \* ToolacheeCtrlMin.csv
- \* ToolacheeOffset.csv
- \* ToolacheeRockCov.csv
- \* ToolacheeRockMask.csv
- \* ToolacheeRockMaxs.csv
- \* ToolacheeRockMeans.csv
- \* ToolacheeRockMins.csv
- \* contactpointReadings.csv
- \* contactpointSensors.csv
- \* gravReadings.csv
- \* gravSensors.csv
- \* magReadings.csv
- \* magSensors.csv
- \* moomba.obsidian
- \* mtReadings.csv
- \* mtSensors.csv
- \* obsidian\_config
- \* seismicReadings.csv
- \* seismicSensors.csv
- \* thermalReadings.csv
- \* thermalSensors.csv
- moomba\_runC
  - \* BigLakeSuiteCtrlMask.csv
  - \* BigLakeSuiteCtrlMax.csv
  - \* BigLakeSuiteCtrlMin.csv
  - \* BigLakeSuiteOffset.csv
  - \* BigLakeSuiteRockCov.csv
  - \* BigLakeSuiteRockMask.csv
  - \* BigLakeSuiteRockMaxs.csv
  - \* BigLakeSuiteRockMeans.csv
  - \* BigLakeSuiteRockMins.csv
  - \* EyreCtrlMask.csv
  - \* EyreCtrlMax.csv
  - \* EyreCtrlMin.csv
  - \* EyreOffset.csv
  - \* EyreRockCov.csv
  - \* EyreRockMask.csv
  - \* EyreRockMaxs.csv
  - \* EyreRockMeans.csv
  - \* EyreRockMins.csv
  - \* InnaminckaCtrlMask.csv
  - \* InnaminckaCtrlMax.csv
  - \* InnaminckaCtrlMin.csv
  - \* InnaminckaOffset.csv

- \* InnaminckaRockCov.csv
- \* InnaminckaRockMask.csv
- \* InnaminckaRockMaxs.csv
- \* InnaminckaRockMeans.csv
- \* InnaminckaRockMins.csv
- \* MurtaCtrlMask.csv
- \* MurtaCtrlMax.csv
- \* MurtaCtrlMin.csv
- \* MurtaOffset.csv
- \* MurtaRockCov.csv
- \* MurtaRockMask.csv
- \* MurtaRockMaxs.csv
- \* MurtaRockMeans.csv
- \* MurtaRockMins.csv
- \* NamurCtrlMask.csv
- \* NamurCtrlMax.csv
- \* NamurCtrlMin.csv
- \* NamurOffset.csv
- \* NamurRockCov.csv
- \* NamurRockMask.csv
- \* NamurRockMaxs.csv
- \* NamurRockMeans.csv
- \* NamurRockMins.csv
- \* SimulationCtrlPoints.csv
- \* SimulationRockProperties.csv
- \* ToolacheeCtrlMask.csv
- \* ToolacheeCtrlMax.csv
- \* ToolacheeCtrlMin.csv
- \* ToolacheeOffset.csv
- \* ToolacheeRockCov.csv
- \* ToolacheeRockMask.csv
- \* ToolacheeRockMaxs.csv
- \* ToolacheeRockMeans.csv
- \* ToolacheeRockMins.csv
- \* contactpointReadings.csv
- \* contactpointSensors.csv
- \* gravReadings.csv
- \* gravSensors.csv
- \* magReadings.csv
- \* magSensors.csv
- \* moomba.obsidian
- \* mtReadings.csv
- \* mtSensors.csv
- \* obsidian\_config
- \* seismicReadings.csv
- \* seismicSensors.csv
- \* thermalReadings.csv



- \* thermalSensors.csv
- moomba\_runC1
  - \* BigLakeSuiteCtrlMask.csv
  - \* BigLakeSuiteCtrlMax.csv
  - \* BigLakeSuiteCtrlMin.csv
  - \* BigLakeSuiteOffset.csv
  - \* BigLakeSuiteRockCov.csv
  - \* BigLakeSuiteRockMask.csv
  - \* BigLakeSuiteRockMaxs.csv
  - \* BigLakeSuiteRockMeans.csv
  - \* BigLakeSuiteRockMins.csv
  - \* EyreCtrlMask.csv
  - \* EyreCtrlMax.csv
  - \* EyreCtrlMin.csv
  - \* EyreOffset.csv
  - \* EyreRockCov.csv
  - \* EyreRockMask.csv
  - \* EyreRockMaxs.csv
  - \* EyreRockMeans.csv
  - \* EyreRockMins.csv
  - \* InnaminckaCtrlMask.csv
  - \* InnaminckaCtrlMax.csv
  - \* InnaminckaCtrlMin.csv
  - \* InnaminckaOffset.csv
  - \* InnaminckaRockCov.csv
  - \* InnaminckaRockMask.csv
  - \* InnaminckaRockMaxs.csv
  - \* InnaminckaRockMeans.csv
  - \* InnaminckaRockMins.csv
  - \* MurtaCtrlMask.csv
  - \* MurtaCtrlMax.csv
  - \* MurtaCtrlMin.csv
  - \* MurtaOffset.csv
  - \* MurtaRockCov.csv
  - \* MurtaRockMask.csv
  - \* MurtaRockMaxs.csv
  - \* MurtaRockMeans.csv
  - \* MurtaRockMins.csv
  - \* NamurCtrlMask.csv
  - \* NamurCtrlMax.csv
  - \* NamurCtrlMin.csv
  - \* NamurOffset.csv
  - \* NamurRockCov.csv
  - \* NamurRockMask.csv
  - \* NamurRockMaxs.csv
  - \* NamurRockMeans.csv
  - \* NamurRockMins.csv

- \* SimulationCtrlPoints.csv
- \* SimulationRockProperties.csv
- \* ToolacheeCtrlMask.csv
- \* ToolacheeCtrlMax.csv
- \* ToolacheeCtrlMin.csv
- \* ToolacheeOffset.csv
- \* ToolacheeRockCov.csv
- \* ToolacheeRockMask.csv
- \* ToolacheeRockMaxs.csv
- \* ToolacheeRockMeans.csv
- \* ToolacheeRockMins.csv
- \* contactpointReadings.csv
- \* contactpointSensors.csv
- \* gravReadings.csv
- \* gravSensors.csv
- \* magReadings.csv
- \* magSensors.csv
- \* moomba.obsidian
- \* mtReadings.csv
- \* mtSensors.csv
- \* obsidian\_config
- \* seismicReadings.csv
- \* seismicSensors.csv
- \* thermalReadings.csv
- \* thermalSensors.csv
- moomba\_runD
  - \* BigLakeSuiteCtrlMask.csv
  - \* BigLakeSuiteCtrlMax.csv
  - \* BigLakeSuiteCtrlMin.csv
  - \* BigLakeSuiteOffset.csv
  - \* BigLakeSuiteRockCov.csv
  - \* BigLakeSuiteRockMask.csv
  - \* BigLakeSuiteRockMaxs.csv
  - \* BigLakeSuiteRockMeans.csv
  - \* BigLakeSuiteRockMins.csv
  - \* EyreCtrlMask.csv
  - \* EyreCtrlMax.csv
  - \* EyreCtrlMin.csv
  - \* EyreOffset.csv
  - \* EyreRockCov.csv
  - \* EyreRockMask.csv
  - \* EyreRockMaxs.csv
  - \* EyreRockMeans.csv
  - \* EyreRockMins.csv
  - \* InnaminckaCtrlMask.csv
  - \* InnaminckaCtrlMax.csv
  - \* InnaminckaCtrlMin.csv

- \* InnaminckaOffset.csv
- \* InnaminckaRockCov.csv
- \* InnaminckaRockMask.csv
- \* InnaminckaRockMaxs.csv
- \* InnaminckaRockMeans.csv
- \* InnaminckaRockMins.csv
- \* MurtaCtrlMask.csv
- \* MurtaCtrlMax.csv
- \* MurtaCtrlMin.csv
- \* MurtaOffset.csv
- \* MurtaRockCov.csv
- \* MurtaRockMask.csv
- \* MurtaRockMaxs.csv
- \* MurtaRockMeans.csv
- \* MurtaRockMins.csv
- \* NamurCtrlMask.csv
- \* NamurCtrlMax.csv
- \* NamurCtrlMin.csv
- \* NamurOffset.csv
- \* NamurRockCov.csv
- \* NamurRockMask.csv
- \* NamurRockMaxs.csv
- \* NamurRockMeans.csv
- \* NamurRockMins.csv
- \* SimulationCtrlPoints.csv
- \* SimulationRockProperties.csv
- \* ToolacheeCtrlMask.csv
- \* ToolacheeCtrlMax.csv
- \* ToolacheeCtrlMin.csv
- \* ToolacheeOffset.csv
- \* ToolacheeRockCov.csv
- \* ToolacheeRockMask.csv
- \* ToolacheeRockMaxs.csv
- \* ToolacheeRockMeans.csv
- \* ToolacheeRockMins.csv
- \* contactpointReadings.csv
- \* contactpointSensors.csv
- \* gravReadings.csv
- \* gravSensors.csv
- \* magReadings.csv
- \* magSensors.csv
- \* moomba.obsidian
- \* mtReadings.csv
- \* mtSensors.csv
- \* obsidian\_config
- \* seismicReadings.csv
- \* seismicSensors.csv

- \* thermalReadings.csv
- \* thermalSensors.csv
- moomba\_runE
  - \* BigLakeSuiteCtrlMask.csv
  - \* BigLakeSuiteCtrlMax.csv
  - \* BigLakeSuiteCtrlMin.csv
  - \* BigLakeSuiteOffset.csv
  - \* BigLakeSuiteRockCov.csv
  - \* BigLakeSuiteRockMask.csv
  - \* BigLakeSuiteRockMaxs.csv
  - \* BigLakeSuiteRockMeans.csv
  - \* BigLakeSuiteRockMins.csv
  - \* EyreCtrlMask.csv
  - \* EyreCtrlMax.csv
  - \* EyreCtrlMin.csv
  - \* EyreOffset.csv
  - \* EyreRockCov.csv
  - \* EyreRockMask.csv
  - \* EyreRockMaxs.csv
  - \* EyreRockMeans.csv
  - \* EyreRockMins.csv
  - \* InnaminckaCtrlMask.csv
  - \* InnaminckaCtrlMax.csv
  - \* InnaminckaCtrlMin.csv
  - \* InnaminckaOffset.csv
  - \* InnaminckaRockCov.csv
  - \* InnaminckaRockMask.csv
  - \* InnaminckaRockMaxs.csv
  - \* InnaminckaRockMeans.csv
  - \* InnaminckaRockMins.csv
  - \* MurtaCtrlMask.csv
  - \* MurtaCtrlMax.csv
  - \* MurtaCtrlMin.csv
  - \* MurtaOffset.csv
  - \* MurtaRockCov.csv
  - \* MurtaRockMask.csv
  - \* MurtaRockMaxs.csv
  - \* MurtaRockMeans.csv
  - \* MurtaRockMins.csv
  - \* NamurCtrlMask.csv
  - \* NamurCtrlMax.csv
  - \* NamurCtrlMin.csv
  - \* NamurOffset.csv
  - \* NamurRockCov.csv
  - \* NamurRockMask.csv
  - \* NamurRockMaxs.csv
  - \* NamurRockMeans.csv

- \* NamurRockMins.csv
- \* SimulationCtrlPoints.csv
- \* SimulationRockProperties.csv
- \* ToolacheeCtrlMask.csv
- \* ToolacheeCtrlMax.csv
- \* ToolacheeCtrlMin.csv
- \* ToolacheeOffset.csv
- \* ToolacheeRockCov.csv
- \* ToolacheeRockMask.csv
- \* ToolacheeRockMaxs.csv
- \* ToolacheeRockMeans.csv
- \* ToolacheeRockMins.csv
- \* contactpointReadings.csv
- \* contactpointSensors.csv
- \* gravReadings.csv
- \* gravSensors.csv
- \* magReadings.csv
- \* magSensors.csv
- \* moomba.obsidian
- \* mtReadings.csv
- \* mtSensors.csv
- \* obsidian\_config
- \* seismicReadings.csv
- \* seismicSensors.csv
- \* thermalReadings.csv
- \* thermalSensors.csv
- moomba\_runJ
  - \* BigLakeSuiteCtrlMask.csv
  - \* BigLakeSuiteCtrlMax.csv
  - \* BigLakeSuiteCtrlMin.csv
  - \* BigLakeSuiteOffset.csv
  - \* BigLakeSuiteRockCov.csv
  - \* BigLakeSuiteRockMask.csv
  - \* BigLakeSuiteRockMaxs.csv
  - \* BigLakeSuiteRockMeans.csv
  - \* BigLakeSuiteRockMins.csv
  - \* EyreCtrlMask.csv
  - \* EyreCtrlMax.csv
  - \* EyreCtrlMin.csv
  - \* EyreOffset.csv
  - \* EyreRockCov.csv
  - \* EyreRockMask.csv
  - \* EyreRockMaxs.csv
  - \* EyreRockMeans.csv
  - \* EyreRockMins.csv
  - \* InnaminckaCtrlMask.csv
  - \* InnaminckaCtrlMax.csv

- \* InnaminckaCtrlMin.csv
- \* InnaminckaOffset.csv
- \* InnaminckaRockCov.csv
- \* InnaminckaRockMask.csv
- \* InnaminckaRockMaxs.csv
- \* InnaminckaRockMeans.csv
- \* InnaminckaRockMins.csv
- \* MurtaCtrlMask.csv
- \* MurtaCtrlMax.csv
- \* MurtaCtrlMin.csv
- \* MurtaOffset.csv
- \* MurtaRockCov.csv
- \* MurtaRockMask.csv
- \* MurtaRockMaxs.csv
- \* MurtaRockMeans.csv
- \* MurtaRockMins.csv
- \* NamurCtrlMask.csv
- \* NamurCtrlMax.csv
- \* NamurCtrlMin.csv
- \* NamurOffset.csv
- \* NamurRockCov.csv
- \* NamurRockMask.csv
- \* NamurRockMaxs.csv
- \* NamurRockMeans.csv
- \* NamurRockMins.csv
- \* SimulationCtrlPoints.csv
- \* SimulationRockProperties.csv
- \* ToolacheeCtrlMask.csv
- \* ToolacheeCtrlMax.csv
- \* ToolacheeCtrlMin.csv
- \* ToolacheeOffset.csv
- \* ToolacheeRockCov.csv
- \* ToolacheeRockMask.csv
- \* ToolacheeRockMaxs.csv
- \* ToolacheeRockMeans.csv
- \* ToolacheeRockMins.csv
- \* contactpointReadings.csv
- \* contactpointSensors.csv
- \* gravReadings.csv
- \* gravSensors.csv
- \* magReadings.csv
- \* magSensors.csv
- \* moomba.obsidian
- \* mtReadings.csv
- \* mtSensors.csv
- \* obsidian\_config
- \* seismicReadings.csv

- \* seismicSensors.csv
- \* thermalReadings.csv
- \* thermalSensors.csv
- moomba\_runJ2
  - \* BigLakeSuiteCtrlMask.csv
  - \* BigLakeSuiteCtrlMax.csv
  - \* BigLakeSuiteCtrlMin.csv
  - \* BigLakeSuiteOffset.csv
  - \* BigLakeSuiteRockCov.csv
  - \* BigLakeSuiteRockMask.csv
  - \* BigLakeSuiteRockMaxs.csv
  - \* BigLakeSuiteRockMeans.csv
  - \* BigLakeSuiteRockMins.csv
  - \* EyreCtrlMask.csv
  - \* EyreCtrlMax.csv
  - \* EyreCtrlMin.csv
  - \* EyreOffset.csv
  - \* EyreRockCov.csv
  - \* EyreRockMask.csv
  - \* EyreRockMaxs.csv
  - \* EyreRockMeans.csv
  - \* EyreRockMins.csv
  - \* InnaminckaCtrlMask.csv
  - \* InnaminckaCtrlMax.csv
  - \* InnaminckaCtrlMin.csv
  - \* InnaminckaOffset.csv
  - \* InnaminckaRockCov.csv
  - \* InnaminckaRockMask.csv
  - \* InnaminckaRockMaxs.csv
  - \* InnaminckaRockMeans.csv
  - \* InnaminckaRockMins.csv
  - \* MurtaCtrlMask.csv
  - \* MurtaCtrlMax.csv
  - \* MurtaCtrlMin.csv
  - \* MurtaOffset.csv
  - \* MurtaRockCov.csv
  - \* MurtaRockMask.csv
  - \* MurtaRockMaxs.csv
  - \* MurtaRockMeans.csv
  - \* MurtaRockMins.csv
  - \* NamurCtrlMask.csv
  - \* NamurCtrlMax.csv
  - \* NamurCtrlMin.csv
  - \* NamurOffset.csv
  - \* NamurRockCov.csv
  - \* NamurRockMask.csv
  - \* NamurRockMaxs.csv

- \* NamurRockMeans.csv
- \* NamurRockMins.csv
- \* SimulationCtrlPoints.csv
- \* SimulationRockProperties.csv
- \* ToolacheeCtrlMask.csv
- \* ToolacheeCtrlMax.csv
- \* ToolacheeCtrlMin.csv
- \* ToolacheeOffset.csv
- \* ToolacheeRockCov.csv
- \* ToolacheeRockMask.csv
- \* ToolacheeRockMaxs.csv
- \* ToolacheeRockMeans.csv
- \* ToolacheeRockMins.csv
- \* contactpointReadings.csv
- \* contactpointSensors.csv
- \* gravReadings.csv
- \* gravSensors.csv
- \* magReadings.csv
- \* magSensors.csv
- \* moomba.obsidian
- \* mtReadings.csv
- \* mtSensors.csv
- \* obsidian\_config
- \* seismicReadings.csv
- \* seismicSensors.csv
- \* thermalReadings.csv
- \* thermalSensors.csv
- moomba\_runK
  - \* BigLakeSuiteCtrlMask.csv
  - \* BigLakeSuiteCtrlMax.csv
  - \* BigLakeSuiteCtrlMin.csv
  - \* BigLakeSuiteOffset.csv
  - \* BigLakeSuiteRockCov.csv
  - \* BigLakeSuiteRockMask.csv
  - \* BigLakeSuiteRockMaxs.csv
  - \* BigLakeSuiteRockMeans.csv
  - \* BigLakeSuiteRockMins.csv
  - \* EyreCtrlMask.csv
  - \* EyreCtrlMax.csv
  - \* EyreCtrlMin.csv
  - \* EyreOffset.csv
  - \* EyreRockCov.csv
  - \* EyreRockMask.csv
  - \* EyreRockMaxs.csv
  - \* EyreRockMeans.csv
  - \* EyreRockMins.csv
  - \* InnaminckaCtrlMask.csv



- \* InnaminckaCtrlMax.csv
- \* InnaminckaCtrlMin.csv
- \* InnaminckaOffset.csv
- \* InnaminckaRockCov.csv
- \* InnaminckaRockMask.csv
- \* InnaminckaRockMaxs.csv
- \* InnaminckaRockMeans.csv
- \* InnaminckaRockMins.csv
- \* MurtaCtrlMask.csv
- \* MurtaCtrlMax.csv
- \* MurtaCtrlMin.csv
- \* MurtaOffset.csv
- \* MurtaRockCov.csv
- \* MurtaRockMask.csv
- \* MurtaRockMaxs.csv
- \* MurtaRockMeans.csv
- \* MurtaRockMins.csv
- \* NamurCtrlMask.csv
- \* NamurCtrlMax.csv
- \* NamurCtrlMin.csv
- \* NamurOffset.csv
- \* NamurRockCov.csv
- \* NamurRockMask.csv
- \* NamurRockMaxs.csv
- \* NamurRockMeans.csv
- \* NamurRockMins.csv
- \* SimulationCtrlPoints.csv
- \* SimulationRockProperties.csv
- \* ToolacheeCtrlMask.csv
- \* ToolacheeCtrlMax.csv
- \* ToolacheeCtrlMin.csv
- \* ToolacheeOffset.csv
- \* ToolacheeRockCov.csv
- \* ToolacheeRockMask.csv
- \* ToolacheeRockMaxs.csv
- \* ToolacheeRockMeans.csv
- \* ToolacheeRockMins.csv
- \* contactpointReadings.csv
- \* contactpointSensors.csv
- \* gravReadings.csv
- \* gravSensors.csv
- \* magReadings.csv
- \* magSensors.csv
- \* moomba.obsidian
- \* mtReadings.csv
- \* mtSensors.csv
- \* obsidian\_config

- \* seismicReadings.csv
- \* seismicSensors.csv
- \* thermalReadings.csv
- \* thermalSensors.csv
- moomba\_runK2
  - \* BigLakeSuiteCtrlMask.csv
  - \* BigLakeSuiteCtrlMax.csv
  - \* BigLakeSuiteCtrlMin.csv
  - \* BigLakeSuiteOffset.csv
  - \* BigLakeSuiteRockCov.csv
  - \* BigLakeSuiteRockMask.csv
  - \* BigLakeSuiteRockMaxs.csv
  - \* BigLakeSuiteRockMeans.csv
  - \* BigLakeSuiteRockMins.csv
  - \* EyreCtrlMask.csv
  - \* EyreCtrlMax.csv
  - \* EyreCtrlMin.csv
  - \* EyreOffset.csv
  - \* EyreRockCov.csv
  - \* EyreRockMask.csv
  - \* EyreRockMaxs.csv
  - \* EyreRockMeans.csv
  - \* EyreRockMins.csv
  - \* InnaminckaCtrlMask.csv
  - \* InnaminckaCtrlMax.csv
  - \* InnaminckaCtrlMin.csv
  - \* InnaminckaOffset.csv
  - \* InnaminckaRockCov.csv
  - \* InnaminckaRockMask.csv
  - \* InnaminckaRockMaxs.csv
  - \* InnaminckaRockMeans.csv
  - \* InnaminckaRockMins.csv
  - \* MurtaCtrlMask.csv
  - \* MurtaCtrlMax.csv
  - \* MurtaCtrlMin.csv
  - \* MurtaOffset.csv
  - \* MurtaRockCov.csv
  - \* MurtaRockMask.csv
  - \* MurtaRockMaxs.csv
  - \* MurtaRockMeans.csv
  - \* MurtaRockMins.csv
  - \* NamurCtrlMask.csv
  - \* NamurCtrlMax.csv
  - \* NamurCtrlMin.csv
  - \* NamurOffset.csv
  - \* NamurRockCov.csv
  - \* NamurRockMask.csv

- \* NamurRockMaxs.csv
- \* NamurRockMeans.csv
- \* NamurRockMins.csv
- \* SimulationCtrlPoints.csv
- \* SimulationRockProperties.csv
- \* ToolacheeCtrlMask.csv
- \* ToolacheeCtrlMax.csv
- \* ToolacheeCtrlMin.csv
- \* ToolacheeOffset.csv
- \* ToolacheeRockCov.csv
- \* ToolacheeRockMask.csv
- \* ToolacheeRockMaxs.csv
- \* ToolacheeRockMeans.csv
- \* ToolacheeRockMins.csv
- \* contactpointReadings.csv
- \* contactpointSensors.csv
- \* gravReadings.csv
- \* gravSensors.csv
- \* magReadings.csv
- \* magSensors.csv
- \* moomba.obsidian
- \* mtReadings.csv
- \* mtSensors.csv
- \* obsidian\_config
- \* seismicReadings.csv
- \* seismicSensors.csv
- \* thermalReadings.csv
- \* thermalSensors.csv

The copyright of individual parts of the supplement might differ from the CC BY 4.0 License.
